# Supplementary material for: Copper-Assisted Direct Growth of Vertical Graphene Nanosheets on Glass Substrates by Low-Temperature Plasma-Enhanced Chemical Vapour Deposition Process
Source: PubMed Central journal article supplement (PMC4523503; doi:10.1186/s11671-015-1019-8), 2015-08-04
Supplement: 11671_2015_1019_MOESM1_ESM.pdf [file 11671_2015_1019_MOESM1_ESM.pdf]

## Additional File 1

# Copper-Assisted Direct Growth of Vertical Graphene Nanosheets on Glass Substrates by Low Temperature Plasma Enhanced Chemical Vapor Deposition Process

Yifei Ma<sup>1</sup>, Haegyung Jang<sup>2</sup>, Changhyun Pang<sup>1</sup> and Heeyeop Chae<sup>1,2,\*</sup>

<sup>1</sup>School of Chemical Engineering, Sungkyunkwan University (SKKU),

Suwon, 440-746, Republic of Korea

<sup>2</sup>SKKU Advanced Institute of Nanotechnology (SAINT), Sungkyunkwan University (SKKU),

Suwon, 440-746, Republic of Korea

E-mail: hchae@skku.edu, Tel: +82-31-290-7263.

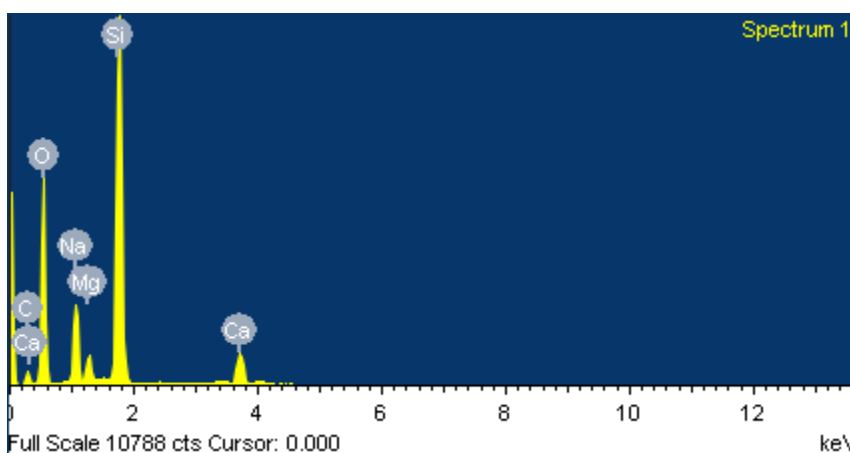

**Fig. S1.** Energy dispersive spectrometer analysis image of VG film on glass substrate grown with assistance of copper catalyst.
